# Supplementary material for: Rational design and synthesis of excavated trioctahedral Au nanocrystals
Source: Royal Society of Chemistry journal article supplement (doi:10.1039/c5nr02017d), 2015-01-01
Supplement: c5nr02017d1.pdf [file c5nr02017d1.pdf]

## Electronic Supplementary Information (ESI)

### Rational design and synthesis of excavated Au nanocrystals

Qiaoli Chen,<sup>a</sup> Yanyan Jia,<sup>a</sup> Wei Shen,<sup>a</sup> Shuifen Xie,<sup>\*b</sup> Yanan Yang,<sup>a</sup> Zhenming Cao,<sup>a</sup> Zhaoxiong Xie<sup>\*a</sup>

and Lansun Zheng<sup>a</sup>

<sup>a</sup> State Key Laboratory of Physical Chemistry of Solid Surfaces

Collaborative Innovation Center of Chemistry for Energy Materials

Department of Chemistry, College of Chemistry and Chemical Engineering, Xiamen University,  
Xiamen, Fujian, 361005, China

<sup>b</sup> Research Institute for Biomimetics and Soft Matter

Department of Physics, School of Physics and Mechanical & Electrical Engineering, Xiamen  
University, Xiamen, Fujian, 361005, China

E-mail: [zxxie@xmu.edu.cn](mailto:zxxie@xmu.edu.cn), [sfxie@xmu.edu.cn](mailto:sfxie@xmu.edu.cn)

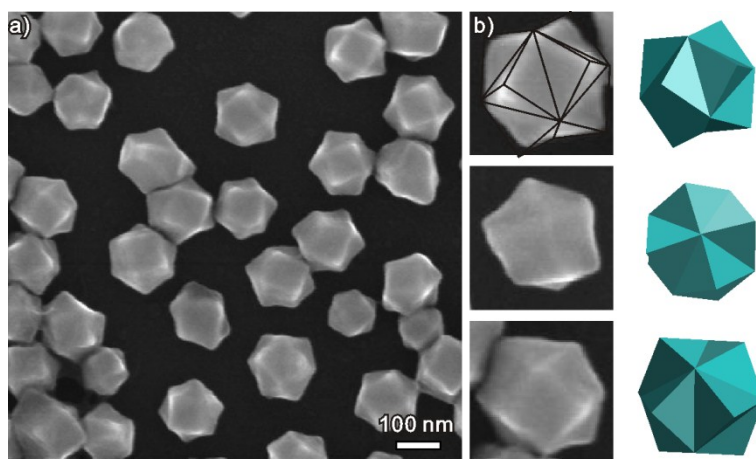

**Figure S1.** a) SEM image of the as-synthesized TOH Au NCs; b) Enlarged SEM images of TOH Au NCs viewing from different directions and their corresponding models, which are bounded by 24 {221} facets.

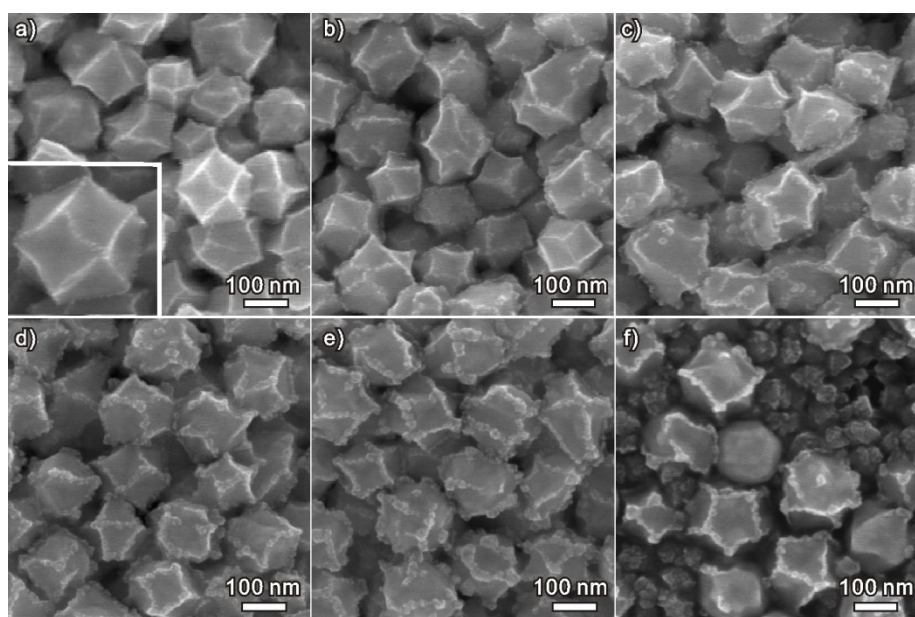

**Figure S2.** SEM images of corresponding Au-Pd heterogeneous NCs synthesized by varying the amount of aqueous solution of  $\text{H}_2\text{PdCl}_4$  ( $1.0 \text{ mmol L}^{-1}$ ): a) 0.10 mL, b) 0.30 mL, c) 0.50 mL, d) 0.70 mL, e) 1.0 mL, f) 3.0 mL, respectively.

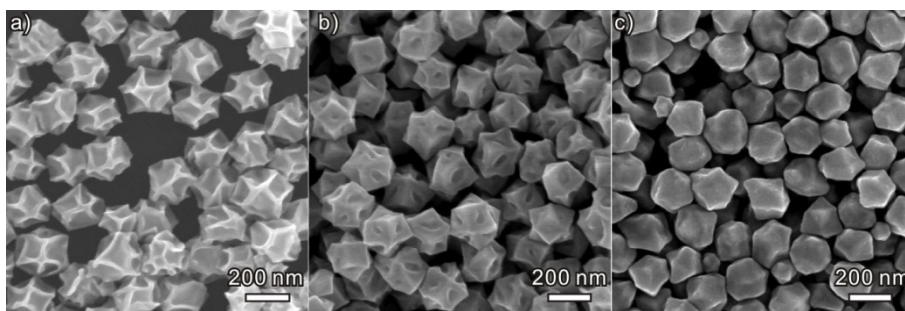

**Figure S3.** SEM images of Au NCs synthesized at different temperatures: a) 6 °C, b) 30 °C, c) 50 °C. The amount of aqueous solution of HAuCl<sub>4</sub> (1.0 mmol L<sup>-1</sup>) was 3.0 mL.

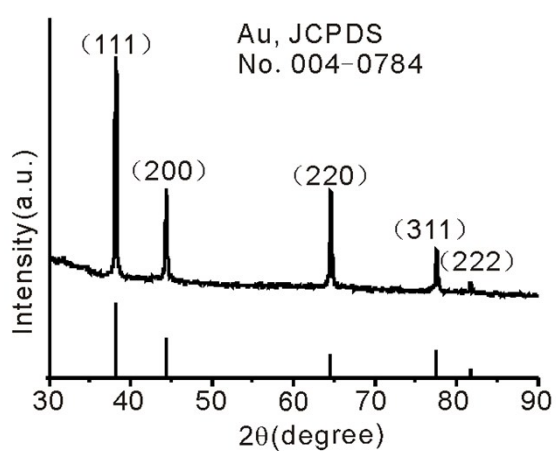

**Figure S4.** XRD pattern of the excavated TOH Au NCs.

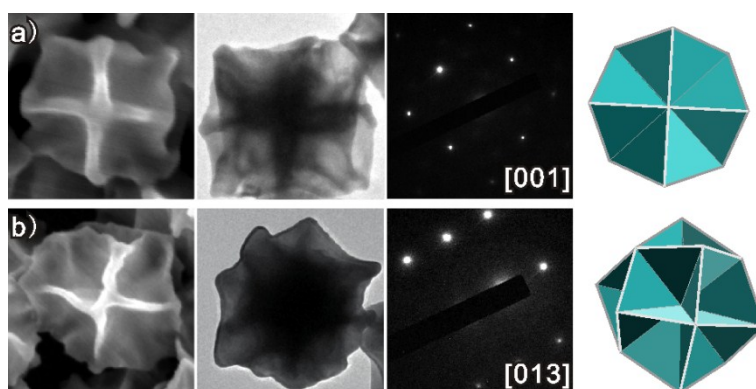

**Figure S5.** SEM images, high-magnification TEM images, corresponding SAED patterns and schematic models of an individual excavated TOH Au NCs viewed along [001] and [013] directions, respectively.

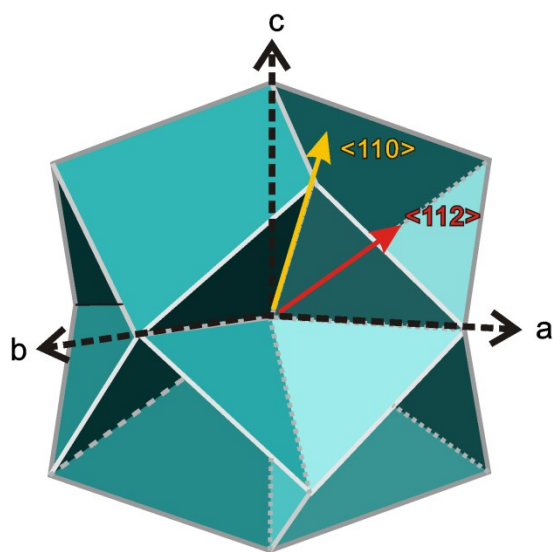

**Figure S6.** Schematic model for the growth orientation of the excavated TOH Au nanocrystal.

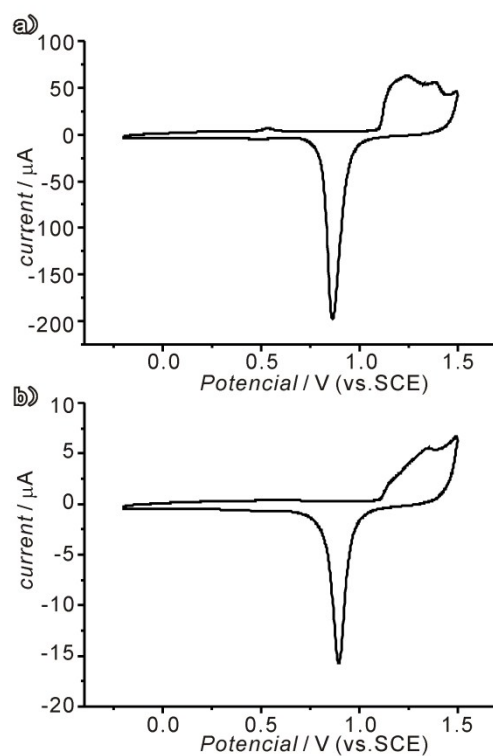

**Figure S7.** a) CV curve of the excavated TOH Au NCs loaded onto a glassy carbon electrode; b) CV curve of a polycrystalline gold electrode. (Tested in 0.1 M H<sub>2</sub>SO<sub>4</sub> at the scan rate of 50 mV s<sup>-1</sup>)

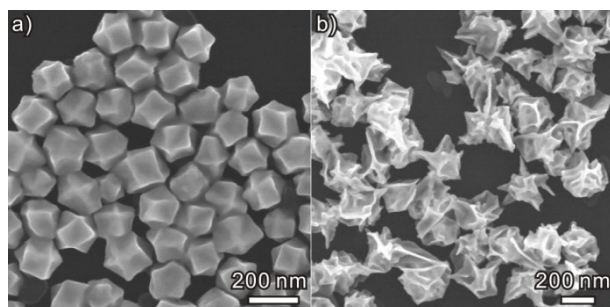

**Figure S8.** SEM images of the Au NCs synthesized in refrigerator: a) original temperature of reaction solution is 30 °C; b) original temperature of reaction solution is 12 °C.

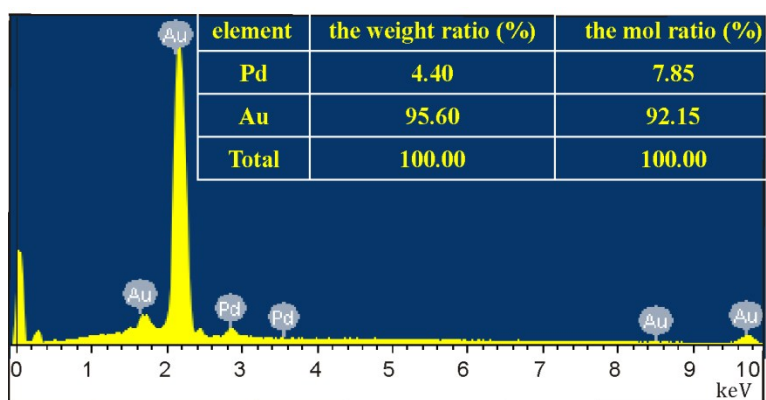

**Figure S9.** EDS of the as-synthesized excavated TOH Au-Pd alloy NCs.

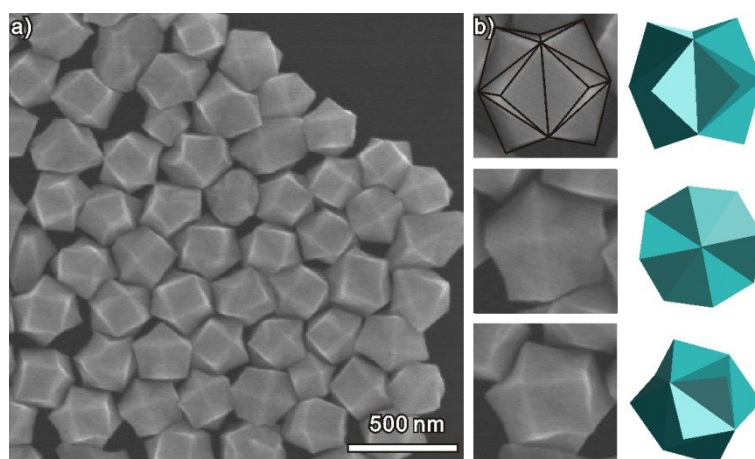

**Figure S10.** a) SEM image of the TOH Au NCs with the same size of the excavated TOH Au NCs; b) Enlarged SEM images of TOH Au NCs viewing from different directions and their corresponding models, which are bounded by 24  $\{221\}$  facets.

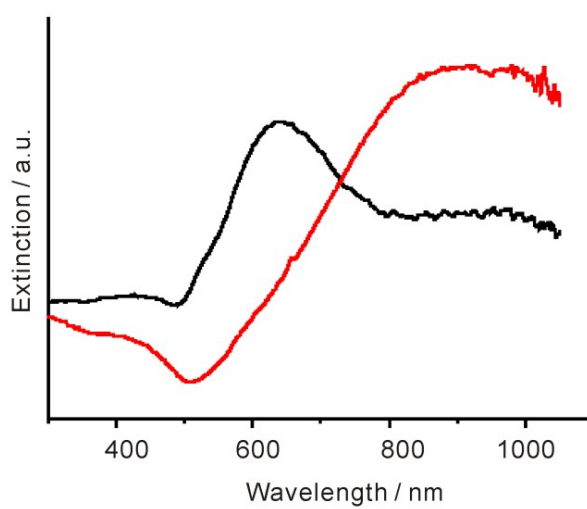

**Figure 11.** The comparison of extinction spectra of TOH Au NCs (black line) and excavated TOH Au NCs (red line).

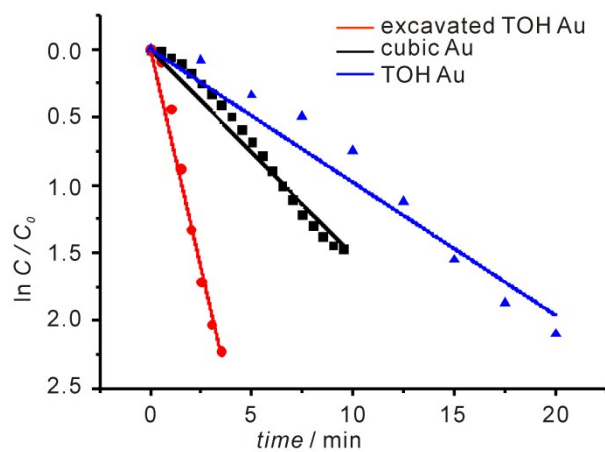

**Figure S12.**  $\ln(C/C_0)$  versus time during the course of reduction of *p*-nitrophenol catalyzed by using excavated TOH Au NCs, cubic Au NCs and TOH Au NCs, respectively.
